1 Early and late evoked brain responses  
2 differentially reflect feature encoding and  
3 perception in the flash-lag illusion  
4

5 Julian Keil<sup>1,2</sup>, Daniel Senkowski<sup>1</sup>, & James K. Moran<sup>1†</sup>

6 <sup>1</sup> Department of Psychiatry and Psychotherapy, Multisensory Integration Lab, Charité  
7 Universitätsmedizin Berlin, Germany

8 <sup>2</sup> Biological Psychology Christian-Albrechts-University Kiel, Kiel, Germany

9 †corresponding author: [james-kenneth.moran@charite.de](mailto:james-kenneth.moran@charite.de)

10

11 **Short title:** Evoked brain correlates of the flash-lag illusion  
12

13 **Data availability statement:** Data available upon reasonable request subject to approval from  
14 both institutions' ethics committees.  
15

16 **Declarations of interest:** The authors declare no competing interests.

17 **Ethics approval statement:** The study was carried out in accordance with the 2008 Declaration  
18 of Helsinki and was approved by the ethics commission of the Charité – Universitätsmedizin  
19 Berlin (Approval number: EA1/169/11).

20 **Author Contributions:** Study Design: JK, DS, JKM, Data Collection: JKM, Data Analysis:  
21 JK; Manuscript preparation: JK, DS, JKM

22 **Acknowledgments:** This research was funded by a grant to DS from the German Research  
23 Foundation (SE1859/4- 1). We thank Marianne Bröker, Alex Masurovsky, Teresa Ramme, Lisa  
24 Renziehausen, and Joseph Wooldridge for their assistance gathering the data.

25

26

27 **Keywords:** Postdiction, Flash-Lag Illusion, EEG, ERP

28

29 **Highlights:**

30 Flash-lag illusion relates primarily to late evoked brain potentials (>300ms)

31 Illusion vs. no-illusion trials showed difference in fusiform gyrus

32 Flash-lag illusion could involve postdiction-driven integration of ongoing stimuli

33

34 *Abstract:*

35 In the flash-lag illusion (FLI), the position of a flash presented ahead of a moving bar is  
36 mislocalized, so the flash appears to lag the bar. Currently it is not clear whether this effect is  
37 due to early perceptual-related neural processes such as motion extrapolation or reentrant  
38 processing, or due to later feedback processing relating to postdiction, i.e. retroactively altered  
39 perception. We presented 17 participants with the FLI paradigm while recording EEG. A central  
40 flash occurred either 51ms (“early”) or 16ms (“late”) before the bar moving from left to right  
41 reached the screen center. Participants judged whether the flash appeared to the right (“no flash  
42 lag illusion”) or to the left (“flash-lag illusion”) of the bar. Using single-trial linear modelling,  
43 we examined the influence of timing (“early” vs. “late”) and perception (“illusion” vs. “no  
44 illusion”) on flash-evoked brain responses, and estimated the cortical sources underlying the  
45 FLI. Perception of the FLI was associated with a late window (368-452ms) in the ERP, with  
46 larger deflections for illusion than no illusion trials, localized to the left fusiform gyrus. An  
47 earlier frontal and occipital component (200-276ms) differentiated time-locked early vs. late  
48 stimulus presentation. Our results suggest a postdiction-related reconstruction of ambiguous  
49 sensory stimulation involving late processes in the occipito-temporal cortex, previously  
50 associated with temporal integration phenomena. This indicates that perception of the FLI relies  
51 on an interplay between ongoing stimulus encoding of the moving bar and feedback processing  
52 of the flash, which takes place at later integration stages.

## 53 **1 Introduction**

54 In our environment, incoming stimuli are continuously integrated into the ongoing stream of  
55 sensory inputs, leading to smooth conscious perception. Some perceptual illusions could  
56 provide a clue as to how this is performed. In the case of the Flash-Lag illusion (FLI), when a  
57 moving object is presented with a briefly flashed stimulus, the moving object is misperceived  
58 as being further along its trajectory than it really is (Nijhawan, 1994). Although there are a  
59 number of theoretical assumptions regarding the origins of the FLI, many have in common the  
60 idea of a designated time window, within which the moving object and the flash could be  
61 integrated (Hubbard, 2014). Perception is shaped by input preceding the flash stimulus and  
62 there is likely also a time window of a few hundreds of milliseconds within which information  
63 that is presented after a stimulus can retroactively affect the perception of this stimulus (Sergent,  
64 2018; Shimojo, 2014). Theories differ in terms of the relative weighting of the pre-flash and  
65 post-flash sensory processing for the FLI. In a parallel manner, the proposed neural mechanisms  
66 underlying these theories are also separate, with some emphasizing early, temporally stimulus-  
67 locked processing (e.g. Hogendoorn, 2020) and others emphasizing later stimulus decoupled  
68 global processing (Sergent, 2018).

69 Theories focusing on the importance of pre-stimulus sensory processing for perception have  
70 linked the FLI to interactions between the higher visual area (V5) and the primary visual cortex  
71 (V1). One of the most thoroughly elaborated theories, both in theoretical and empirical terms,  
72 is the motion extrapolation theory (Hogendoorn, 2020), in which the window of integration is  
73 reflected in higher level visual areas, which are preactivated in anticipation of ongoing  
74 movement, as a means of compensating for temporal lags in neural transmission from lower-  
75 to higher-level feedforward connections (Hogendoorn & Burkitt, 2019). In these terms there is  
76 a disjunct between the anticipated movement of the moving stimulus and the unpredictable  
77 onset of the flash stimulus. Recently, Hogendoorn & Burkitt, (2018) contrasted predictable vs.  
78 non-predictable moving stimuli and found that the former could be decoded from relatively  
79 early EEG activity, i.e., around 140ms after stimulus onset. Moreover, a functional  
80 neuroimaging study showed that motion-related stimulus processing in V5 and V1 appears to  
81 be subject to predictive coding, with less predictable visual movements producing greater  
82 BOLD responses (Schellekens et al., 2016). Another elegant explanation of the FLI is the non-  
83 linear latency difference theory (Arstila, 2015), which involves reentrant processing from V5  
84 to V1. In this theory, reentrant processing from V5 to V1 is related to conscious perception.  
85 The FLI is predicted to stem from a violation of this process: the stimuli create a conflict

86 between the reentrant processing of the early stimulus, i.e., the moving bar, and feedforward  
87 processing of the later flash stimulus in V1, leading to the illusory perception of a lagging flash.  
88 In sum, there are compelling theories linking FLI to early (<200ms) visual prestimulus  
89 processing, tightly coupled to the order of stimulus presentation.

90 In contrast to these theories, the concept of postdiction emphasizes the importance of  
91 information that follows the flash. Perception phenomena in which a second stimulus  
92 retroactively affects the perception of a first stimulus have been coined postdiction (Shimojo,  
93 2014). Foundational findings in support of the postdiction hypothesis come from Eagleman &  
94 Sejnowski, (2000), who posit that the window of integration is biased by the subsequent motion  
95 of the stimulus. In support of this, the authors demonstrated that the FLI is maintained and can  
96 even be further manipulated when only a post-flash movement is present, but far less so when  
97 only pre-flash movement is present (Eagleman & Sejnowski, 2007). Postdiction is currently  
98 operationally defined, and agnostic as to the underlying neural mechanisms. However,  
99 integration across greater timescales, decoupled from the actual temporal order of stimulus  
100 presentation, will likely require an involvement of top-down processes (Sergent, 2018). Thus,  
101 in contrast to theories of early stimulus-locked neural processing, postdiction is more  
102 compatible with global top-down processing at later integration stages.

103 Other temporally governed perceptual phenomena show a split between early and later  
104 components in the empirical literature (Förster et al., 2020). They have been invoked to support  
105 competing theories. For example, backward-masking shows the dependency of conscious  
106 perception on reentrant processing between V5 and V1 (Fahrenfort et al., 2007). However, Cul  
107 et al., (2007) found that the difference in backward-masked trials subjectively rated as invisible  
108 vs. visible, was not related to early P1 or N1 components, but rather to the later P3 component.  
109 In a parallel manner, retroactively altered perception of basic stimuli in the FLI may be  
110 dependent on either earlier local-recurrent loops or on later top-down reamplification across  
111 wider areas of the brain.

112 A more precise picture of the time course of cortical activation would help clarify the relative  
113 strengths of the above theoretical accounts on perception in the FLI. Up until now, however,  
114 there has been little investigation of the phenomenon using methods with a fine time resolution,  
115 such as EEG or MEG. One EEG study from Stekelenburg & Vroomen, (2005) has shown the  
116 effects of an audiovisual manipulation of the visual flash lag, which reduced the flash-lag effect  
117 and a correspondingly reduced N1 event-related potential (ERP) component. Moreover, the FLI  
118 can be disrupted at approximately 200ms post flash by TMS stimulation of MT+ (Maus et al.,

119 2013). In another EEG study, Chakravarthi & VanRullen (2012) examined the single-trial  
120 oscillatory correlates of FLI, showing that the illusion was dependent on the phase of alpha and  
121 beta oscillations pre- and post-flash onset, respectively. This suggests the periodic sampling of  
122 temporal windows rather than the continuous sampling of individual time points. Still, an ERP  
123 study comparing flash-lag vs. non-flash-lag processes directly across a longer time scale is still  
124 missing from this literature.

125 In the present study, we examined the ERP components of a FLI, testing directly the difference  
126 in the ERPs between stimuli where the flash-lag is perceived and where it is not perceived.  
127 Differences in early components (C50, P1, N1 <200ms) would be congruent with theories  
128 emphasizing early processing, e.g., motion extrapolation or reentrant processing, whereas  
129 differences in later components (>300ms) would support theories that emphasize later feedback  
130 processing of postdiction.

131

## 132 **2 Methods**

### 133 *2.1 Participants*

134 An initial sample of 29 paid volunteers participated in this study. All had normal or corrected  
135 to normal vision and reported no history of neurological or psychiatric illness. Twelve  
136 participants were removed from the sample after participation: Six were excluded due to noisy  
137 EEG data or insufficient detection of the catch trials, and six were excluded because they had  
138 too few trials in the examined conditions (e.g., too few or too many illusion trials, see below).  
139 After preprocessing of the electrophysiological data, 17 participants (8 female, mean age: 38.47  
140 (Range: 24-52)) were included in the final data analysis. Handedness 15 were right-handed  
141 according to the Edinburgh Handedness Inventory, (Oldfield 1971), with two <50% right-  
142 handed. The study was conducted in accordance with the local Ethics Committee of the Charité  
143 – Universitätsmedizin Berlin as well as with the 2008 Declaration of Helsinki, and all  
144 participants provided written informed consent (Ethical approval number: EA1/169/11).

### 145 *2.2 Task*

146 Participants were seated in a dimly lit, electrically and acoustically shielded chamber, while  
147 being presented with stimuli of the flash-lag paradigm. Participants had to indicate by a button-  
148 press whether a visual flash appeared to the right or to the left of a moving bar (Fig. 1A). On a  
149 CRT monitor, a black bar ( $1.33^\circ \times 0.28^\circ$  visual angle) moved from the left to the right with a  
150 speed of  $10^\circ$  visual angle per second for 1400 ms. The distance from the bar onset to the screen  
151 center was  $6.74^\circ$  visual angle, and the bar reached the screen center after 700 ms. A fixation  
152 cross was presented for the whole trial at the bottom center of the screen. Above the fixation  
153 cross ( $3.05^\circ$  visual angle), a white circle ( $0.28^\circ$  visual angle) flashed for 16.7 ms, either if the  
154 bar was 51 ms (*early* trials) or 16 ms (*late* trials) away from reaching the center of the screen.  
155 After the bar reached the right side of the screen, the bar remained stationary for 100 ms before  
156 disappearing and the fixation cross turned into a hand symbol as a response cue. The response  
157 cue ensured that there was no confounding motor activity during the stimulation period. The  
158 response interval had a random duration between 1500 ms and 2500 ms. Additional audiovisual  
159 trials were presented, which contained a 16.7 ms 72 dB(SPL) white noise burst 100 ms before  
160 the bar reached the screen center (Stekelenburg and Vroomen, 2005). These trials were not  
161 entered into the data analysis because they were not relevant for the current research question.  
162 Overall, the experiment consisted of 200 trials per condition (early flash without a burst; late  
163 flash without a burst; early or late flash with noise burst), 168 trials (equally distributed across  
164 conditions; ~15% of all presented trials) with a reversed direction (right to left) of the bar

165 movement, and 172 catch trials (equally distributed across conditions; ~15% of all presented  
166 trials) in which the central fixation cross was surrounded by a box with the cross within it. This  
167 change in catch trials occurred 60 ms before the bar reached the center of the screen and  
168 participants were required to respond to the trials by pressing both buttons simultaneously.  
169 Trials with a reversed movement were included to avoid habituation effects. Catch trials were  
170 included to ensure that participants focused on the central fixation cross. Trials of the different  
171 experimental conditions, reversed direction trials, and catch trials were presented in random  
172 order. In sum, 1140 trials were presented. Each trial had a duration of 3500 ms, leading to a  
173 total experimental runtime of about 66 minutes (divided into 15 blocks).

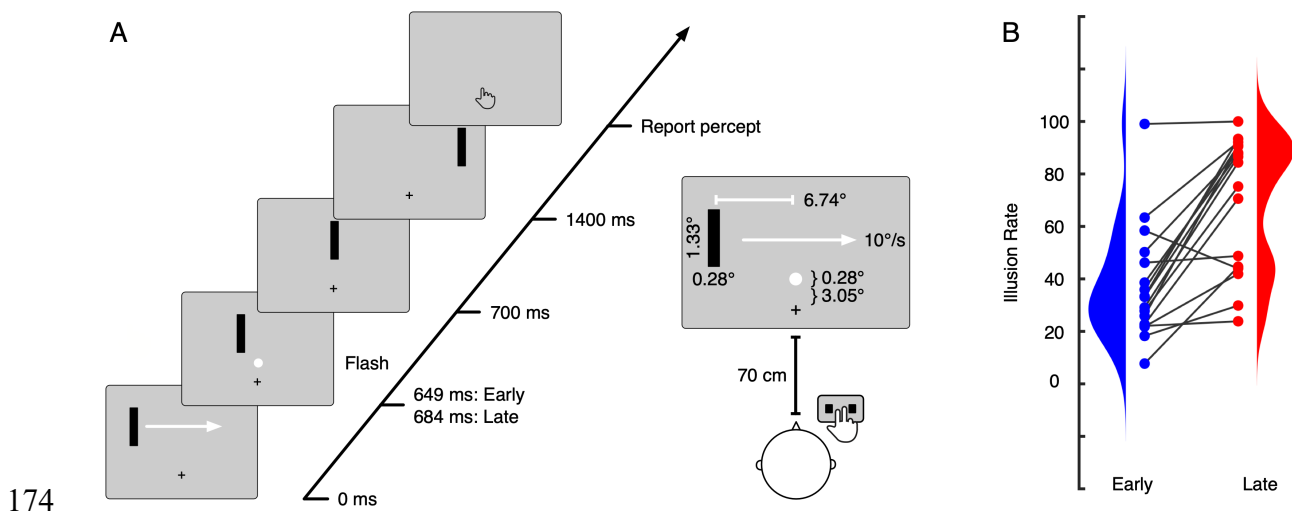

175 **Figure 1: Experimental setup of visual flash-lag trials and behavioral findings.** (A) A black  
176 bar moved from left to right across the screen for 1400 ms. Either 51 or 16 ms before the bar  
177 reached the center of the screen, a white circle was flashed for 16.7 ms. Participants had 1500-  
178 2500 ms to respond using the right hand. (B) Participants perceived the flash-lag illusion more  
179 often when the flash appeared late (i.e., 16.7 ms prior to the bar reaching the center; red)  
180 compared to when the flash appeared early (i.e., 51 ms prior to the bar reaching the center;  
181 blue).

### 182 2.3 Behavioral Data Analysis

183 Participants reported their perception with their right hand using a CEDRUS response pad, with  
184 a left button pressed by the index finger as the circle appearing 'left' relative to the bar and a  
185 right button pressed by the middle finger as the circle appearing 'right' relative to the bar and  
186 both buttons simultaneously as soon as the catch trial cue appeared. From the participants'  
187 responses, trials were categorized as *illusion trials* if participants reported the central flash on  
188 the left of the bar moving from the left to the right of the screen, i.e., if the central flash

189 perceptually lagged the moving bar and as *no illusion trials*, if they correctly reported the flash  
190 to be to the right (relative to the moving bar) when the flash was presented.

#### 191 2.4 EEG Data Analysis

192 EEG data were recorded with a high-density 128-channel EEG system (EasyCap, Herrsching,  
193 Germany), including one horizontal and one vertical EOG electrode placed below and lateral  
194 to the right ocular orbit to register eye movements using Brainamp DC amplifiers  
195 (Brainproducts, Gilching, Germany). Recordings were made against nose reference at a  
196 sampling frequency of 1000 Hz and with a passband of 0.016–250 Hz.

197 EEG data preprocessing and data analysis were conducted in MATLAB (MathWorks, Natick,  
198 MA, USA) using EEGLAB (<http://www.sccn.ucsd.edu/eeglab>) (Delorme & Makeig, 2004),  
199 FieldTrip (<http://www.ru.nl/fcdonders/fieldtrip>) (Oostenveld, Fries, Maris, & Schoffelen,  
200 2010) and customized scripts. First, data were filtered offline using windowed sinc FIR filters  
201 (Widmann et al., 2015) (high pass: 1 Hz, low pass: 125 Hz, notch: 49–51 Hz). Furthermore,  
202 data were down sampled to 500 Hz and epochs from – 1 to 1 s relative to flash onset were  
203 extracted from the data. Epochs with large artefacts were removed by visual inspection (M  
204 removed trials = 222.00, SD = 169.90). To further correct for EOG artefacts (blinks, muscle  
205 activity) and strong cardiac activity, independent component analysis (ICA) was conducted  
206 (Runica, Lee et al., 1999). On average 3.65 ICA components (SD = 1.32) were removed.  
207 Channels with extremely high artifacts were interpolated with distance interpolation (M  
208 removed electrodes = 7.65 electrodes, SD = 3.41). The EOG channels were not included in the  
209 further analysis of ERPs. For the analysis of ERPs, epochs were lowpass filtered below 45 Hz  
210 using windowed sinc FIR filters (Widmann et al., 2015), and the epoch mean was subtracted.  
211 For the EEG data analysis only trials in which the bar moved from the left to the right were  
212 used. After artifact rejection on average 81.4 (SD +/- 35.27) trials were available (*early illusion*  
213 = 119.7 +/- 44.51, *early no illusion* = 47.0 +/- 36.85, *late illusion* = 56.29 +/- 29.83, *late no*  
214 *illusion* = 102.64 +/- 37.23).

215 To investigate the cortical sources of the observed ERP responses in the electrode-level  
216 analysis, we followed previously established analysis pipelines (Keil et al., 2017; Speer et al.,  
217 2020) and performed source localization using a linearly constrained minimum variance  
218 (LCMV) beamformer algorithm (VanVeen et al., 1997). A leadfield was generated using a  
219 realistic three-shell boundary-element volume conduction model based on the MNI standard  
220 brain (MNI; <http://www.mni.mcgill.ca>) for each grid point in the brain on a regular 10-mm grid.  
221 Within each participant, we first constructed a common spatial filter across all conditions from



222 the covariance matrix of the averaged single trials at electrode level and the respective leadfield.  
223 The use of a common spatial filter for all data guaranteed that differences in source space  
224 activity could be ascribed to power differences in the different conditions and not to differences  
225 between filters. The lambda regularization parameter was set to 10%, to compensate for  
226 potential rank reduction during preprocessing. We then projected the single condition ERPs for  
227 the two time-windows identified in the electrode-level analysis into source space using the  
228 precomputed common filter. A baseline correction was performed for each time window and  
229 condition, using the inverse interval prior to stimulus onset for each time window. To this end,  
230 the activity in the respective baseline interval was first subtracted from the post-stimulus  
231 interval of interest, and the resulting difference was then divided by the average baseline  
232 activity. The anatomical regions of the source localization were determined based on the  
233 automated anatomic labelling atlas (AAL, Tzourio-Mazoyer et al., 2002).

### 234 2.5 Statistical Analyses of EEG Data:

235 The influence of the flash onset latency and the perception of the illusion on the event-related  
236 potentials was simultaneously evaluated using single-trial linear models in the first 500 ms after  
237 flash onset. In the first level, the single trial amplitude of the ERP was related to the within-  
238 subject factors Time (*early vs. late*), Illusion (*illusion vs. no illusion*), and the interaction  
239 between both factors in each participant. In the second level, beta values for the two factors and  
240 the interaction were compared to zero across participants. To this end, we conducted a non-  
241 parametric cluster-based permutation test that addresses the multiple comparison problem by  
242 clustering together samples adjacent in time and space (Maris & Oostenveld, 2007). The  
243 experimental cluster-based test statistic was evaluated against a permutation distribution in  
244 order to test the null hypothesis of no difference between beta values and zero using a two-  
245 tailed dependent-samples test. The critical alpha level was set to 0.05. In order to control for  
246 multiple comparisons across the 2-dimensional matrix of 126 (electrodes)\*251 (samples)  
247 comparisons, the clustering algorithm searches for neighboring elements below the critical  
248 alpha level and sums the t-values in these clusters. Then the condition labels are shuffled, and  
249 the same comparison is computed on the shuffled data. This shuffling step is repeated for 1000  
250 iterations, and for each iteration the largest sum of t-values is retained ('maxsum' setting).  
251 Finally, the t-value sums in the clusters of the empirical data are compared to the distribution  
252 of the clusters obtained in iterations. The p-value for each empirical cluster thus is a percentile  
253 indicating the likelihood to obtain a cluster of this size based on randomly shuffled data.  
254 Importantly, the clusters obtained in this analysis are not due to any *á priori* selection of a time  
255 interval but are the solely based on the empirical data. In order to further compare the ERP

256 between the different factors, trials were averaged within the clusters identified in the previous  
257 steps within each participant. Then, we compared ERP amplitudes between *early vs. late* and  
258 *illusion vs. no illusion* trials using parametric paired-sample t-tests. Additionally, we correlated  
259 the illusion rate with the ERP amplitude using a non-parametric Spearman correlation.  
260 Moreover, to explore the possibility of further ERP differences between conditions, we  
261 computed a 2x2 repeated-measures ANOVA for the two-dimensional channel by time space  
262 with FDR correction for multiple comparisons. The alpha-level was set to 0.05 in all post-hoc  
263 exploratory analyses. Bayes Factors were computed (BF10, Rouder et al., 2009) as an indicator  
264 of the relative evidence for the H0 and H1 on the power averaged within the clusters identified  
265 in the previous steps. A BF10 between 1 and 3 indicates anecdotal support for the alternative  
266 hypothesis (H1), whereas a BF10 between 3 and 10, and above 10 indicate respectively  
267 moderate and strong support for H1. A BF10 of 1 indicates equal support for H1 and the null  
268 hypothesis (H0) while, on the other side, a BF10 between 1/3 and 1, 1/10 and 1/3 and below  
269 1/10, provides respectively anecdotal, moderate and strong support for H0 (Aczel et al., 2017).  
270 In source space, we again used the aforementioned non-parametric cluster-based permutation  
271 test to compare source space activity for the factors Time (*early vs. late*) and Illusion (*illusion*  
272 *vs. no illusion*) based on 10000 permutations. Source space activity averaged across identified  
273 clusters was again correlated with the illusion rate using a non-parametric Spearman  
274 correlation. The alpha-level was again set to 0.05 in all post-hoc exploratory analyses in source  
275 space, and Bayes Factors were computed as an indicator of the relative evidence for the H0 and  
276 H1.

## 277 **3 Results**

### 278 *3.1 Behavior*

279 The likelihood to perceive the FLI was influenced by the temporal distance between the bar and  
280 the flash ( $t(16) = -5.5091$ ,  $CI = [-0.4551 -0.2022]$ ,  $p < 0.001$ ,  $BF10 = 548.0798$ ). Replicating  
281 the findings previous studies (Stekelenburg & Vroomen, 2005), the occurrence of the early  
282 flash (Figure 1B blue,  $37.28 \pm 21.55$ , mean %  $\pm$  SD) resulted in less illusions than the late  
283 flash (Figure 1B red  $70.14 \pm 25.30$ ). Participants correctly identified the catch trials ( $87.04$   
284  $\pm 16.88$ ).

### 285 *3.2 ERPs*

286 The influence of the flash onset latency and the perception of the illusion on the evoked brain  
287 potentials was evaluated using linear modelling within each participant. Then the beta values

288 for the factors Time (*early* vs. *late*), Illusion (*illusion* vs. *no illusion*), and the interaction  
289 between the two factors were statistically compared to zero across participants.

290 For the factor Time, the cluster-based permutation test revealed an interval between 200 and  
291 276 ms during which the beta values differed from zero. This suggests that in this interval, the  
292 single-trial ERPs differ between *early* and *late* trials. Specifically, a cluster of negative beta  
293 values was found across frontal electrodes (cluster- $p = 0.005 \pm 0.0044$ ), and a cluster of  
294 positive beta values was found across occipital electrodes (cluster- $p = 0.011 \pm 0.0065$ ).  
295 Averaging the ERP amplitudes across the electrodes of the negative cluster, trials in which the  
296 flash occurred early (Figure 2A blue,  $0.9257 \pm 0.5831$ , mean  $\mu\text{V} \pm \text{SD}$ ) compared to trials  
297 in which the flash occurred late (Figure 2A red,  $0.9310 \pm 0.6350$ ) were associated with  
298 numerically reduced positive ERP amplitudes. However, this difference was not statistically  
299 significant ( $t(16) = -0.0991$ ,  $\text{CI} = [-0.1183 \ 0.1077]$ ,  $p = 0.9223$ ,  $\text{BF}_{10} = 0.2500$ ). Averaged  
300 across the positive cluster, trials in which the flash occurred early (Figure 2E blue,  $-0.7983 \pm$   
301  $0.5706$ ) were associated with a numerically less negative ERP amplitudes than trials in which  
302 the flash occurred late (Figure 2E red,  $-0.8149 \pm 0.5738$ ). This difference was not significant  
303 ( $t(16) = 0.3063$ ,  $\text{CI} = [-0.0983 \ 1.1315]$ ,  $p = 0.7633$ ,  $\text{BF}_{10} = 0.2594$ ). Finally, the correlation  
304 analysis between the ERP amplitude averaged over the respective clusters and the illusion rate  
305 was not significant (occipital cluster:  $r(15) = 0.3971$ ,  $p = 0.1156$ ,  $\text{BF}_{10} = 0.6361$ ; frontal cluster:  
306  $r(15) = -0.3260$ ,  $p = 0.2014$ ,  $\text{BF}_{10} = 0.4146$ ). Taken together, comparing the beta values  
307 obtained from the linear modeling of single-trial ERP amplitudes to zero suggests that ERPs  
308 differ between early and late trials. However, the less sensitive comparison between the  
309 averages across trials of the two conditions was not significant. Together, this suggests that the  
310 difference between early and late conditions is relatively small.

311

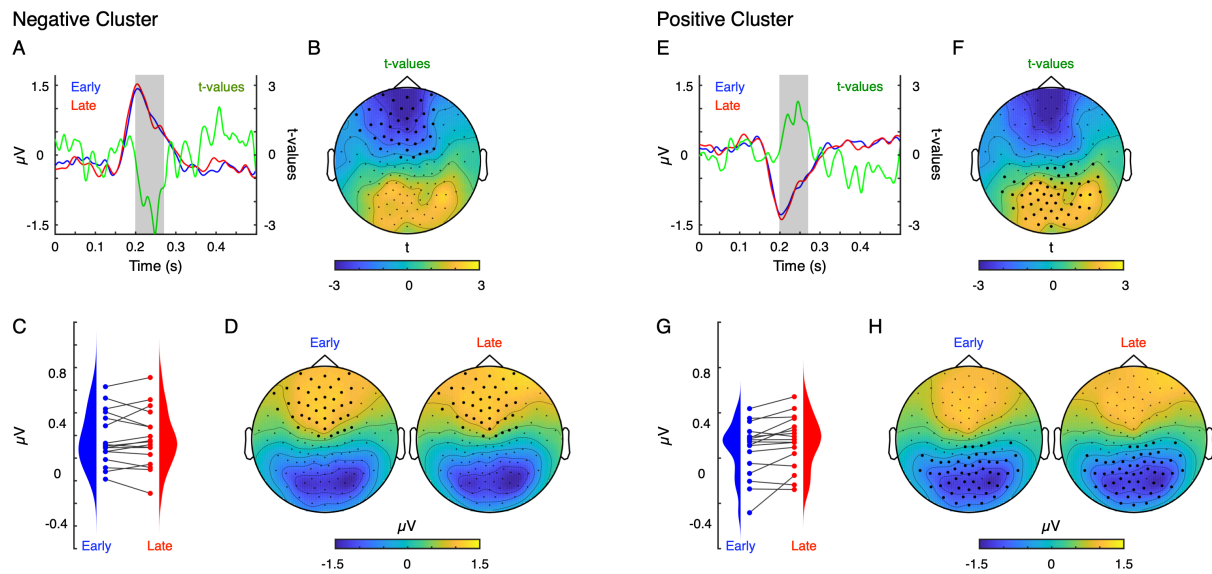

312

313 **Figure 2: Differences between early and late flash-lag trials are reflected in early evoked**  
314 **responses.** (A and D) Early (blue) and late (red) flash-lag trials evoked a positive peak around  
315 200 ms after flash onset. In the comparison of the beta values from the linear model against  
316 zero across participants (green line), an early interval reflected the factor Time. (B) The early  
317 interval (200 – 276 ms) comprised a negative cluster across frontal electrodes. (C) Even though  
318 the beta values derived from single trials differed significantly from zero, the ERP amplitudes  
319 averaged across trials did not differ between early and late trials. (E-H) Same as A-D, but for  
320 the positive cluster across occipital electrodes in the same interval.

321 For the factor Illusion, the cluster-based permutation test revealed a late interval between 368  
322 and 452 ms during which the beta values differed significantly from zero (Figure 3). This  
323 suggests significant single-trial ERPs differences between *illusion* and *no illusion* trials.  
324 Specifically, a cluster of negative beta values was found across central electrodes (cluster- $p =$   
325  $0.02 \pm 0.0087$ ). Averaged across the negative cluster, trials in which the participants perceived  
326 the FLI were associated with a more positive ERP amplitude (Figure 3A blue,  $0.3803 \pm$   
327  $0.2055$ ) than trials in which participants did not perceive the illusion (Figure 3A red,  $0.2339 \pm$   
328  $0.2410$ ). This difference was statistically significant ( $t(16) = 4.8825$ ,  $CI = [0.0828 \ 0.2100]$ ,  $p <$   
329  $0.001$ ,  $BF_{10} = 181.3138$ ). Across participants the correlation between the ERP amplitude  
330 averaged over the cluster and the illusion rate was not significant ( $r(15) = 0.3333$ ,  $p = 0.1910$ ,  
331  $BF_{10} = 0.4311$ ).

332

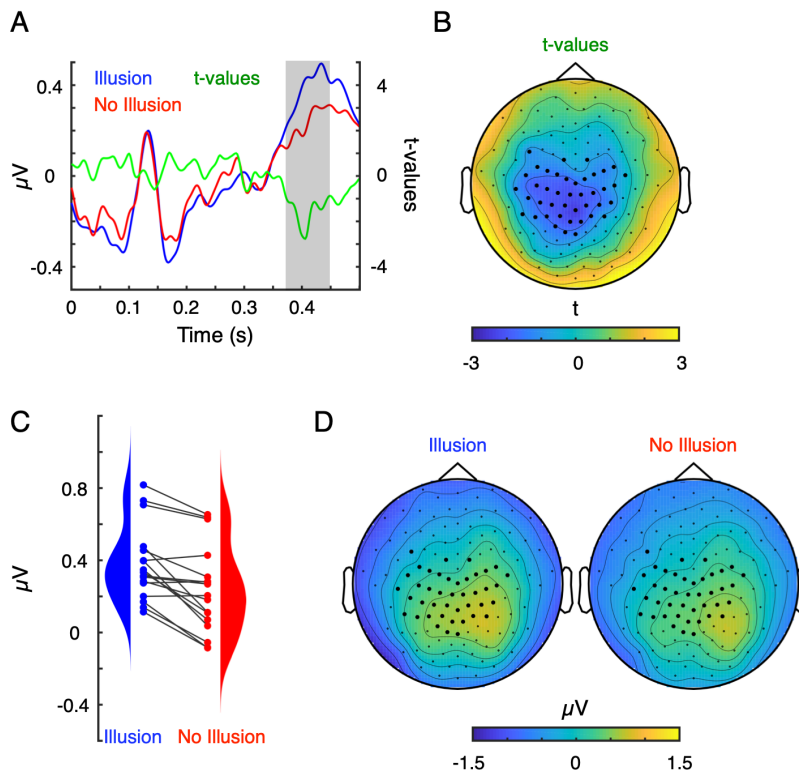

333

334 **Figure 3: Differences between illusion and no illusion flash-lag trials are reflected in a late**  
335 **evoked response.** (A and D) Illusion (blue) and no illusion (red) flash-lag trials evoked a  
336 positive peak around 400 ms after flash onset. In the comparison of the beta values from the  
337 linear model against zero across participants (green line), a late interval reflected the factor  
338 Illusion. (B) The late interval (368 – 452 ms) comprised a negative cluster across central  
339 electrodes. (C) The beta values derived from single trials differed significantly from zero, and  
340 the ERP amplitudes averaged across trials were more positive for illusion compared to no  
341 illusion trials.

342 The exploratory 2x2 repeated-measures ANOVA with the factors Time (early vs. late) and  
343 Illusion (*flash-lag* vs. *no flash-lag*) did not reveal any effects. Visual inspection of the  
344 uncorrected F and BF10 values indicates short-lived effects, and overall little support for the  
345 H1 outside the previously described effects (Supplementary Material).

### 346 3.3 Source Analyses

347 For the factor Time, the comparison between source space activity for *early* and *late* trials in  
348 the 200 to 276 ms interval after stimulus onset did not reveal any significant differences, which  
349 is in line with the ERPs analysis (averaged across trials) between conditions at the sensor level.  
350 For the factor Illusion the analysis of source space activity revealed an enhanced activity for  
351 *illusion* vs. *no illusion* trials in the 368 ms to 452 ms interval (cluster-p = 0.0313 +/- 0.0034;  
352 Figure 4). Comparison to the AAL atlas indicated the left inferior occipital gyrus as the primary

353 source of the peak difference. Averaged across the nodes of the cluster, trials in which the  
354 participants perceived the FLI (1.6783 +/- 1.8015) were associated with stronger source space  
355 signal change from baseline than trials in which participants did not perceive the illusion  
356 (0.5888 +/- 0.8211). This difference was statistically significant ( $t(16) = 3.6991$ ,  $CI = [0.4651$   
357  $1.7139]$ ,  $p = 0.0019$ ,  $BF_{10} = 21.3389$ ). Across participants there was no significant correlation  
358 between the ERP amplitudes averaged over the cluster and the illusion rates ( $r(15) = 0.1961$ ,  $p$   
359  $= 0.4492$ ,  $BF_{10} = 0.2442$ ).

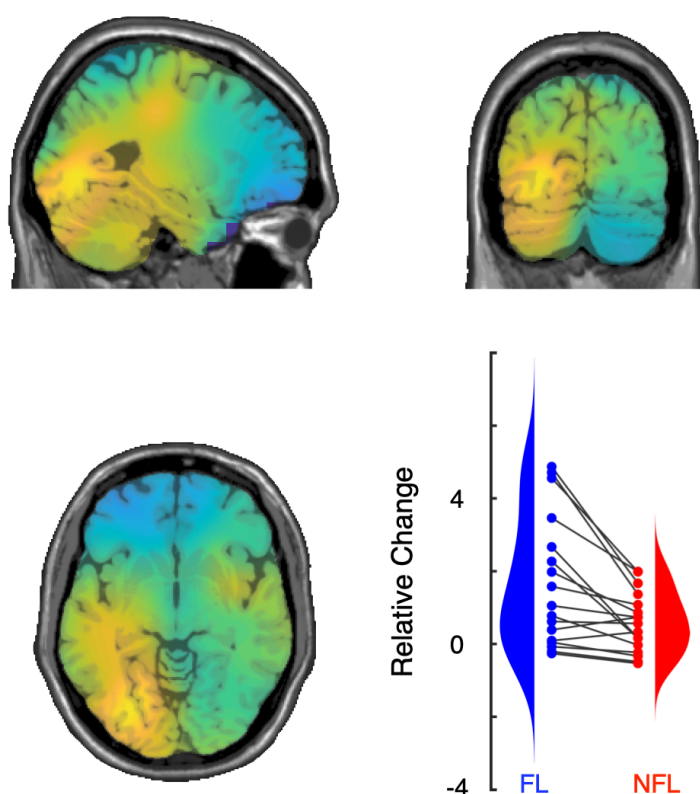

360  
361 **Figure 4: Source analysis for the factor Illusion revealed an involvement of the left**  
362 **fusiform gyrus.** The comparison of source-space activity indicated an occipital cluster where  
363 trials in which participants perceived the flash-lag illusion evoked a stronger signal change from  
364 baseline than trials in which they did not perceive the illusion.

## 365 4 Discussion

366 In our study, we used ERPs to clarify the temporal and spatial neural correlates of the FLI.  
367 Some theories predict earlier, stimulus-dependent temporal processing, and others later  
368 stimulus-independent temporal processing. We conducted this analysis on a large pool of  
369 participants, from which we selected those with an approximately bistable perception of the  
370 illusion. A late positive ERP component (368-452ms after the flash onset), localized to the

371 inferior occipito-temporal cortex differentiated between illusion and no illusion perception  
372 trials. Illusion trials evoked larger evoked cortical responses than trials in which no illusion  
373 occurred. Moreover, in our study, FLI perception was higher in late vs. early trials, with  
374 corresponding differences in an earlier ERP component (200-276ms).

375 We found evidence for the influence of late modulation in FLI, which indicates that late  
376 processing in the inferior occipital cortex is an important neural origin where perception in the  
377 FLI is reconstructed. Thus, later ERP components (>300ms, e.g. P300), which are typically  
378 associated with higher-order cognitive (Huang et al., 2015) or post-perceptual processes  
379 (Schröder et al., 2021) seem to be critical for the difference between illusion and no illusion  
380 perception, at least in our paradigm. This is consistent with a more global processing of visual  
381 information in the FLI, temporally decoupled from the stimulus sequence (Shimojo, 2014;  
382 Sergent, 2018). One possible interpretation of these results is that attention can modulate the  
383 strength of the FLI. For example, the FLI is increased when attentional resources are reduced,  
384 such as in a dual-task condition (Sarich et al., 2007) or spatial attention (Baldo et al., 2002).  
385 However, top-down attention typically produces enlarged ERPs components in primary sensory  
386 regions (Keil et al., 2017; Lange et al., 2008), which is difficult to reconcile with our results, in  
387 which larger ERP components are associated with FL rather than NFL. In summary, our  
388 findings show that late ERP components differentiate between illusion and no illusion  
389 perceptions, which supports the postdiction view on the FLI.

390 Our results are less congruent with theories that postulate early visual processing as critical to  
391 the FLI, such as the motion extrapolation (Hogendoorn, 2020) and reentrant based non-linear  
392 motion integration (Arstila, 2015). Visual inspection suggests small differences in early  
393 components, and Bayes Factors argues against the interpretation of a meaningful difference in  
394 early components < 200ms. However, it is also possible that there are important early effects  
395 that are too subtle to detect with our sample size. On the face of it, this is difficult to reconcile  
396 with the empirical findings that the FLI can be disrupted at approximately 200ms post flash by  
397 TMS stimulation of MT+ (Maus et al., 2013). However, this may mean that early activity is  
398 necessary for later processing of the visual stimuli, but not sufficient for the perception of the  
399 illusion, or that early activity is correlated with later processing rather than being causally  
400 necessary (Sergent, 2018). In support of this, we observe that there were differences between  
401 the early and late onset flashes at 200 ms to 276ms, which suggests that processing at this time  
402 relates to the registration of differences between the physical properties of the stimuli, rather  
403 than the FLI itself. Thus, interference with this physical coregistration of stimuli could disrupt  
404 upstream perception of the FLI. In all, our results do not appear to reflect the early stimulus-

405 locked processing predicted by motion extrapolation or non-linear motion integration. The FLI  
406 dependent on later neural processing steps, decoupled from the temporal order of stimulus  
407 presentation.

408 Information regarding the cortical areas involved in the reconstruction of visual perception in  
409 the FLI come from our source analysis. This analysis highlighted important regions in FLI  
410 processing in approximately left fusiform gyrus. Activity in this region, including later ERP  
411 activity has been associated with a heterogenous group of spatial and temporal integrative  
412 phenomena. Previously, Meyer & Olson, (2011) found that inferotemporal cells in monkeys  
413 were sensitive to violations of statistical regularities in sequentially presented stimuli. Sequence  
414 representation has been generalized to encompass various linguistic phenomena (Dehaene et  
415 al., 2015). In a broader view, inferior temporal areas have been implicated as a part of a  
416 subcortical-extrastriate-fronto-parietal network necessary for the conscious perception of  
417 bistable stimuli (Bisenius et al., 2015). Integrating FLI with these models of sensory integration  
418 in this region could provide a new way of understanding the FLI phenomenon.

419 The study has some limitations. Our sample was restricted to those remaining participants with  
420 a more balanced number of illusion and no illusion trials, so it is possible that the current  
421 findings are not generalizable to the other participants. Future studies could adapt the flash  
422 onset to individual perception thresholds to ensure a larger sample size (as in e.g. Chakravarthi  
423 & VanRullen, 2012). Connected with this, the ERPs were based on a relatively small number  
424 of trials per person. It may also be that these factors contributed to the absence of earlier effects  
425 in the present study. Nevertheless, the sensitivity of the single-trial linear modelling combined  
426 with robust clustering statistics provide reason for confidence in the significant later ERP  
427 components. Our source analysis with EEG and non-individualized MRI templates is limited  
428 in spatial resolution, and future studies involving e.g. fMRI or MEG, would be necessary to  
429 strengthen these findings. Our primary stimuli went left to right, which is congruent with  
430 reading stimuli, this may in part explain the activation in the fusiform gyrus. Future studies  
431 could build on these findings by ERPs with different types of flash lag variants to test the  
432 generalizability of these findings. Furthermore, an attention manipulation could help  
433 unconfound potential effects (Koch & Tsuchiya, 2012; Koivisto, Kainulainen, & Revonsuo,  
434 2009; Moran et al., in press). Overall, we believe that these limitations do not substantially  
435 affected our main finding that late evoked potentials reflect perception-related processing in the  
436 FLI. Nevertheless, they should be considered in further research studies examining the neural  
437 signatures of the FLI.



#### 438 4.1 Conclusion

439 Our study shows for the first time the time-course of neural activity of the FLI, differentiating  
440 illusion from non-illusion trials. Although the different theories posited to explain FLI likely  
441 all have some purchase on the truth of this complex phenomenon, our results argue for a greater  
442 focus on later postdictive processing, decoupled from the order of stimulus presentation.

443

## 444 5 References

445 Aczel, B., Palfi, B., & Szaszi, B. (2017). Estimating the evidential value of significant results  
446 in psychological science. *PLoS One*, *12*(8), e0182651.

447 Arstila, V. (2015). Keeping postdiction simple. *Consciousness and Cognition*, *38*, 205–216.  
448 <https://doi.org/10.1016/j.concog.2015.10.001>

449 Baldo, M. V. C., Kihara, A. H., Namba, J., & Klein, S. A. (2002). Evidence for an Attentional  
450 Component of the Perceptual Misalignment between Moving and Flashing Stimuli. *Perception*,  
451 *31*(1), 17–30. <https://doi.org/10.1068/p3302>

452 Bisenius, S., Trapp, S., Neumann, J., & Schroeter, M. L. (2015). Identifying neural correlates  
453 of visual consciousness with ALE meta-analyses. *NeuroImage*, *122*(C), 177–187.  
454 <http://doi.org/10.1016/j.neuroimage.2015.07.070>

455 Chakravarthi, R., & VanRullen, R. (2012). Conscious updating is a rhythmic process.  
456 *Proceedings of the National Academy of Sciences*, *109*(26), 10599–10604.  
457 <https://doi.org/10.1073/pnas.1121622109>

458 Cul, A. D., Baillet, S., & Dehaene, S. (2007). Brain Dynamics Underlying the Nonlinear  
459 Threshold for Access to Consciousness. *PLOS Biology*, *5*(10), e260.  
460 <https://doi.org/10.1371/journal.pbio.0050260>

461 Dehaene, S., Meyniel, F., Wacongne, C., Wang, L., & Pallier, C. (2015). The Neural  
462 Representation of Sequences: From Transition Probabilities to Algebraic Patterns and  
463 Linguistic Trees. *Neuron*, *88*(1), 2–19. <https://doi.org/10.1016/j.neuron.2015.09.019>

464 Delorme, A., & Makeig, S. (2004). EEGLAB: an open source toolbox for analysis of single-  
465 trial EEG dynamics including independent component analysis. *Journal of Neuroscience*  
466 *Methods*, *134*(1), 9-21.

467 Eagleman, D. M., & Sejnowski, T. J. (2000). Motion integration and postdiction in visual

- 468 awareness. *Science*, 287(5460), 2036–2038. <https://doi.org/10.1126/science.287.5460.2036>
- 469 Eagleman, D. M., & Sejnowski, T. J. (2007). Motion signals bias localization judgments: A  
470 unified explanation for the flash-lag, flash-drag, flash-jump, and Frohlich illusions. *Journal of*  
471 *Vision*, 7(4), 1–12. <https://doi.org/10.1167/7.4.3>
- 472 Fahrenfort, J. J., Scholte, H. S., & Lamme, V. A. F. (2007). Masking Disrupts Reentrant  
473 Processing in Human Visual Cortex. *Journal of Cognitive Neuroscience*, 19(9), 1488–1497.  
474 <https://doi.org/10.1162/jocn.2007.19.9.1488>
- 475 Förster, J., Koivisto, M., & Revonsuo, A. (2020). ERP and MEG correlates of visual  
476 consciousness: The second decade. *Consciousness and Cognition*, 80, 102917.  
477 <https://doi.org/10.1016/j.concog.2020.102917>
- 478 Hogendoorn, H. (2020). Motion Extrapolation in Visual Processing: Lessons from 25 Years of  
479 Flash-Lag Debate. *Journal of Neuroscience*, 40(30), 5698–5705.  
480 <https://doi.org/10.1523/JNEUROSCI.0275-20.2020>
- 481 Hogendoorn, H., & Burkitt, A. N. (2018). Predictive coding of visual object position ahead of  
482 moving objects revealed by time-resolved EEG decoding. *NeuroImage*, 171, 55–61.  
483 <https://doi.org/10.1016/j.neuroimage.2017.12.063>
- 484 Hogendoorn, H., & Burkitt, A. N. (2019). Predictive Coding with Neural Transmission Delays:  
485 A Real-Time Temporal Alignment Hypothesis. *ENeuro*, 6(2).  
486 <https://doi.org/10.1523/ENEURO.0412-18.2019>
- 487 Huang, W.-J., Chen, W.-W., & Zhang, X. (2015). The neurophysiology of P 300--an integrated  
488 review. *European Review for Medical and Pharmacological Sciences*, 19(8), 1480–1488.
- 489 Hubbard, T. L. (2014). The flash-lag effect and related mislocalizations: Findings, properties,  
490 and theories. *Psychological Bulletin*, 140(1), 308–338. <https://doi.org/10.1037/a0032899>
- 491 Keil, J., Pomper, U., Feuerbach, N., & Senkowski, D. (2017). Temporal orienting precedes  
492 intersensory attention and has opposing effects on early evoked brain activity. *NeuroImage*,  
493 148, 230–239. <https://doi.org/10.1016/j.neuroimage.2017.01.039>
- 494 Koch, C., & Tsuchiya, N. (2012). Attention and consciousness: Related yet different. *Trends in*  
495 *Cognitive Sciences*, 16(2), 103–105. <https://doi.org/10.1016/j.tics.2011.11.012>
- 496 Koivisto, M., Kainulainen, P., & Revonsuo, A. (2009). The relationship between awareness and  
497 attention: Evidence from ERP responses. *Neuropsychologia*, 47(13), 2891–2899.  
498 <https://doi.org/10.1016/j.neuropsychologia.2009.06.016>

- 499 Lange, D., P, F., Jensen, O., Bauer, M., & Toni, I. (2008). Interactions between posterior  
500 gamma and frontal alpha/beta oscillations during imagined actions. *Frontiers in Human*  
501 *Neuroscience*, 2. <https://doi.org/10.3389/neuro.09.007.2008>
- 502 Lee, T. W., Girolami, M., & Sejnowski, T. J. (1999). Independent component analysis using an  
503 extended infomax algorithm for mixed subgaussian and supergaussian sources. *Neural*  
504 *Computation*, 11(2), 417–441.
- 505 Maris, E., & Oostenveld, R. (2007). Nonparametric statistical testing of EEG-and MEG-data.  
506 *Journal of Neuroscience Methods*, 164(1), 177-190.
- 507 Maus, G. W., Fischer, J., & Whitney, D. (2013). Motion-Dependent Representation of Space  
508 in Area MT+. *Neuron*, 78(3), 554–562. <https://doi.org/10.1016/j.neuron.2013.03.010>
- 509 Meyer, T., & Olson, C. R. (2011). Statistical learning of visual transitions in monkey  
510 inferotemporal cortex. *Proceedings of the National Academy of Sciences*, 108(48), 19401–  
511 19406. <https://doi.org/10.1073/pnas.1112895108>
- 512 Moran, J.K., Keil, J., Masurovsky, A., Gutwinski, S., Montag, C., & Senkowski, D. (in press).  
513 Multisensory processing can compensate for top-down attention deficits in schizophrenia.  
514 *Cerebral Cortex*.
- 515 Nijhawan, R. (1994). Motion extrapolation in catching. *Nature*, 370(6487), 256–257.  
516 <https://doi.org/10.1038/370256b0>
- 517 Oldfield, R. C. (1971). The assessment and analysis of handedness: the Edinburgh inventory.  
518 *Neuropsychologia*, 9(1), 97-113.
- 519 Oostenveld, R., Fries, P., Maris, E., & Schoffelen, J. M. (2010). FieldTrip: Open source  
520 software for advanced analysis of MEG, EEG, and invasive electrophysiological data.  
521 *Computational Intelligence and Neuroscience*, 2011, 156869-156869.
- 522 Rouder, J. N., Speckman, P. L., Sun, D., Morey, R. D., & Iverson, G. (2009). Bayesian t tests  
523 for accepting and rejecting the null hypothesis. *Psychonomic Bulletin & Review*, 16(2), 225-  
524 237.
- 525 Sarich, D., Chappell, M., & Burgess, C. (2007). Dividing attention in the flash-lag illusion.  
526 *Vision Research*, 47(4), 544–547. <https://doi.org/10.1016/j.visres.2006.09.029>
- 527 Schellekens, W., van Wezel, R. J. A., Petridou, N., Ramsey, N. F., & Raemaekers, M. (2016).  
528 Predictive coding for motion stimuli in human early visual cortex. *Brain Structure and*  
529 *Function*, 221(2), 879–890. <https://doi.org/10.1007/s00429-014-0942-2>

530 Schröder, P., Nierhaus, T., & Blankenburg, F. (2021). Dissociating perceptual awareness and  
531 postperceptual processing: The P300 is not a reliable marker of somatosensory target detection.  
532 *The Journal of Neuroscience*. <http://doi.org/10.1523/JNEUROSCI.2950-20.2021>

533 Sergent, C. (2018). The offline stream of conscious representations. *Philosophical Transactions*  
534 *of the Royal Society B: Biological Sciences*, 373(1755), 20170349.  
535 <https://doi.org/10.1098/rstb.2017.0349>

536 Shimojo, S. (2014). Postdiction: Its implications on visual awareness, hindsight, and sense of  
537 agency. *Frontiers in Psychology*, 5. <https://doi.org/10.3389/fpsyg.2014.00196>

538 Stekelenburg, J. J., & Vroomen, J. (2005). An event-related potential investigation of the time-  
539 course of temporal ventriloquism. *NeuroReport*, 16(6), 641–644.

540 Tzourio-Mazoyer, N., Landeau, B., Papathanassiou, D., Crivello, F., Etard, O., Delcroix, N., ...  
541 & Joliot, M. (2002). Automated anatomical labeling of activations in SPM using a macroscopic  
542 anatomical parcellation of the MNI MRI single-subject brain. *Neuroimage*, 15(1), 273-289.

543 Widmann, A., Schröger, E., & Maess, B. (2015). Digital filter design for electrophysiological  
544 data--a practical approach. *Journal of Neuroscience Methods*, 250, 34–46.  
545 <http://doi.org/10.1016/j.jneumeth.2014.08.002>

546 Van Veen, B. D., van Drongelen, W., Yuchtman, M., & Suzuki, A. (1997). Localization of  
547 brain electrical activity via linearly constrained minimum variance spatial filtering. *IEEE*  
548 *Transactions on Bio-Medical Engineering*, 44(9), 867–880. <http://doi.org/10.1109/10.623056>

549

550

551

552

553

554

555

556

557

558

## 559 6 Supplementary Material

560

561 The exploratory 2x2 repeated-measures ANOVA with the factors Time (*early vs. late*) and  
562 Illusion (*flash-lag vs. no flash-lag*) did not reveal any effects following FDR correction for  
563 multiple comparisons. Visual inspection of the uncorrected F and BF10 values indicates short-  
564 lived effects, and overall little support for the H1 outside the previously described effects.

565

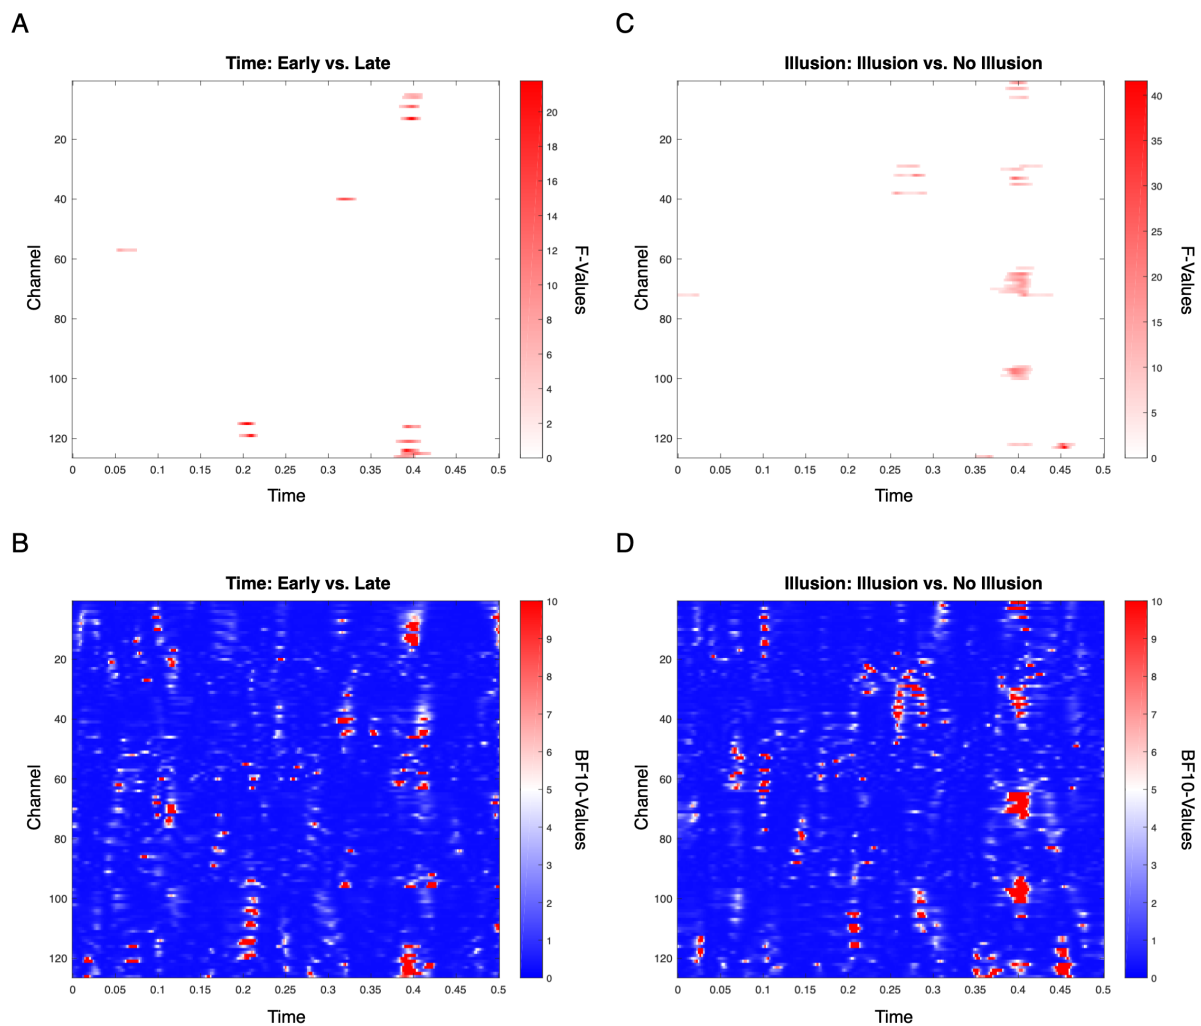

566

567 **Supplementary Figure:** The exploratory 2x2 ANOVA did not reveal any effects outside the  
568 two intervals reported in the linear model analysis. (A) For the factor Time, F-values masked  
569 by the uncorrected threshold of  $p < 0.05$  only reveal scattered peaks. (B) Similarly, BF10-  
570 values are low, indicating little support for the H1. (C and D) Same as A and B but for the  
571 factor Illusion.

572
